# Supplementary material
Source: ML conference proceedings conference paper supplement (https://proceedings.neurips.cc/paper_files/paper/2016/hash/3b92d18aa7a6176dd37d372bc2f1eb71-Abstract.html)
Supplement: Supplementary file [file 3b92d18aa7a6176dd37d372bc2f1eb71-Supplemental.zip]

## Appendix A: Derivation of Posterior for PPG Data

Restating Bayes' rule (Equation 1):

$$\Pr(c, z | \vec{y}, \theta) = \frac{\Pr(\vec{y} | c, z, \theta) \Pr(z | c, \theta) \Pr(c | \theta)}{\sum_{c'} \int \Pr(\vec{y} | c', z', \theta) \Pr(z' | c', \theta) \Pr(c' | \theta) dz'}.$$

Defining  $\Pr(c | \theta) = 1/C$ ,  $\Pr(c | \theta)$  drops:

$$\Pr(c, z | \vec{y}, \theta) = \frac{\Pr(\vec{y} | c, z, \theta) \Pr(z | c, \theta)}{\sum_{c'} \int \Pr(\vec{y} | c', z', \theta) \Pr(z' | c', \theta) dz'}.$$

Inserting the likelihood and prior of  $z$ :

$$\Pr(\vec{y} | c, z, \theta) = \prod_{d=1}^D \text{Pois}(y_d; z W_{cd}); \quad \Pr(z | c, \theta) = \text{Gam}(z; \alpha_c, \beta_c),$$

Bayes' rule becomes:

$$\begin{aligned} \Pr(\vec{y} | c, z, \theta) &= \frac{\prod_d \frac{(z W_{cd})^{y_d} \exp(-z W_{cd})}{y_d!} \frac{z^{\alpha_c-1} \exp(-z \beta_c) \beta_c^{\alpha_c}}{\Gamma(\alpha_c)}}{\sum_{c'} \int \prod_d \frac{(z_{c'} W_{c'd})^{y_d} \exp(-z_{c'} W_{c'd})}{y_d!} \frac{z_{c'}^{\alpha_{c'}-1} \exp(-z_{c'} \beta_{c'}) \beta_{c'}^{\alpha_{c'}}}{\Gamma(\alpha_{c'})} dz_{c'}} \\ &= \frac{(\prod_d W_{cd}^{y_d}) z^{\sum_d y_d} \exp(-z \sum_d W_{cd}) z^{\alpha_c-1} \exp(-z \beta_c) \beta_c^{\alpha_c} \Gamma(\alpha_c)^{-1}}{\sum_{c'} (\prod_d W_{c'd}^{y_d}) \int z^{\sum_d y_d} \exp(-z \sum_d W_{c'd}) z^{\alpha_{c'}-1} \exp(-z \beta_{c'}) \beta_{c'}^{\alpha_{c'}} \Gamma(\alpha_{c'})^{-1} dz_{c'}}. \end{aligned}$$

Imposing the constraint  $\sum_d W_{cd} = 1$  and letting  $\hat{y} = \sum_d y_d$ :

$$\begin{aligned} &= \frac{(\prod_d W_{cd}^{y_d}) z^{\hat{y}} \exp(-z) z^{\alpha_c-1} \exp(-z \beta_c) \beta_c^{\alpha_c} \Gamma(\alpha_c)^{-1}}{\sum_{c'} (\prod_d W_{c'd}^{y_d}) \int z^{\hat{y}} \exp(-z) z^{\alpha_{c'}-1} \exp(-z \beta_{c'}) \beta_{c'}^{\alpha_{c'}} \Gamma(\alpha_{c'})^{-1} dz_{c'}} \\ &= \frac{(\prod_d W_{cd}^{y_d}) z^{\hat{y}+\alpha_c-1} \exp(-z(\beta_c+1)) \beta_c^{\alpha_c} \Gamma(\alpha_c)^{-1}}{\sum_{c'} (\prod_d W_{c'd}^{y_d}) \int z^{\hat{y}+\alpha_{c'}-1} \exp(-z(\beta_{c'}+1)) \beta_{c'}^{\alpha_{c'}} \Gamma(\alpha_{c'})^{-1} dz_{c'}}. \end{aligned}$$

We can get rid of the integral by introducing the factors  $(\beta_c + 1)^{\hat{y}+\alpha_c}$  and  $\Gamma(\hat{y} + \alpha_c)^{-1}$ :

$$= \frac{(\prod_d W_{cd}^{y_d}) \frac{\beta_c^{\alpha_c}}{(\beta_c+1)^{\hat{y}+\alpha_c}} \frac{\Gamma(\hat{y}+\alpha_c)}{\Gamma(\alpha_c)} z^{\hat{y}+\alpha_c-1} \exp(-z(\beta_c+1)) \frac{(\beta_c+1)^{\hat{y}+\alpha_c}}{\Gamma(\hat{y}+\alpha_c)}}{\sum_{c'} (\prod_d W_{c'd}^{y_d}) \frac{\beta_{c'}^{\alpha_{c'}}}{(\beta_{c'}+1)^{\hat{y}+\alpha_{c'}}} \frac{\Gamma(\hat{y}+\alpha_{c'})}{\Gamma(\alpha_{c'})} \int z^{\hat{y}+\alpha_{c'}-1} \exp(-z(\beta_{c'}+1)) \frac{(\beta_{c'}+1)^{\hat{y}+\alpha_{c'}}}{\Gamma(\hat{y}+\alpha_{c'})} dz},$$

and recognizing the integrand as a Gamma distribution, which must integrate to 1. The corresponding term in the numerator is also a Gamma distribution:

$$= \frac{(\prod_d W_{cd}^{y_d}) \frac{\beta_c^{\alpha_c}}{(\beta_c+1)^{\hat{y}+\alpha_c}} \frac{\Gamma(\hat{y}+\alpha_c)}{\Gamma(\alpha_c)}}{\sum_{c'} (\prod_d W_{c'd}^{y_d}) \frac{\beta_{c'}^{\alpha_{c'}}}{(\beta_{c'}+1)^{\hat{y}+\alpha_{c'}}} \frac{\Gamma(\hat{y}+\alpha_{c'})}{\Gamma(\alpha_{c'})}} \text{Gam}(z; \alpha_c + \hat{y}, \beta_c + 1)$$

Multiplying the numerator and denominator by  $(\hat{y}!)^{-1}$ :

$$= \frac{(\prod_d W_{cd}^{y_d}) \frac{\beta_c^{\alpha_c}}{(\beta_c+1)^{\hat{y}+\alpha_c}} \frac{\Gamma(\hat{y}+\alpha_c)}{\Gamma(\alpha_c) \hat{y}!}}{\sum_{c'} (\prod_d W_{c'd}^{y_d}) \frac{\beta_{c'}^{\alpha_{c'}}}{(\beta_{c'}+1)^{\hat{y}+\alpha_{c'}}} \frac{\Gamma(\hat{y}+\alpha_{c'})}{\Gamma(\alpha_{c'}) \hat{y}!}} \text{Gam}(z; \alpha_c + \hat{y}, \beta_c + 1),$$

we can now recognize the ratios in the numerator and denominator as negative binomial distributions. Thus Equation 1 can be written as:

$$\Pr(c, z | \vec{y}, \theta) = \frac{(\prod_d W_{cd}^{y_d}) \text{NB}(\hat{y}; \alpha_c, \frac{1}{\beta_c+1})}{\sum_{c'} (\prod_d W_{c'd}^{y_d}) \text{NB}(\hat{y}; \alpha_{c'}, \frac{1}{\beta_{c'}+1})} \text{Gam}(z; \alpha_c + \hat{y}, \beta_c + 1).$$

We can now easily obtain  $\Pr(c | \vec{y}, \theta)$  by integrating  $\Pr(c, z | \vec{y}, \theta)$  over  $z$ :

$$\begin{aligned} \Pr(c | \vec{y}, \theta) &= \frac{(\prod_d W_{cd}^{y_d}) \text{NB}(\hat{y}; \alpha_c, \frac{1}{\beta_c+1})}{\sum_{c'} (\prod_d W_{c'd}^{y_d}) \text{NB}(\hat{y}; \alpha_{c'}, \frac{1}{\beta_{c'}+1})} \\ &= \frac{\text{NB}(\hat{y}; \alpha_c, \frac{1}{\beta_c+1}) \exp(\sum_d y_d \ln W_{cd})}{\sum_{c'} \text{NB}(\hat{y}; \alpha_{c'}, \frac{1}{\beta_{c'}+1}) \exp(\sum_d y_d \ln W_{c'd})}, \end{aligned}$$

which is our claimed expression in Equation 2.

## Appendix B: Derivation of M-Step Update Rules

Expectation-Maximization (EM) maximizes a lower bound of the log-likelihood called the free energy  $\mathcal{F}(\theta_t, \theta_{t-1})$ , which is a function of the parameter values from the previous and current iteration of EM:

$$\mathcal{F}(\theta_t, \theta_{t-1}) = \sum_n \sum_{c'} \Pr(c' | \bar{y}^{(n)}, \theta_{t-1}) (\ln \Pr(\bar{y}^{(n)} | c', \theta_t) + \ln \Pr(c' | \theta_t)) + H(\theta_{t-1}).$$

where  $H(\theta_{t-1})$  is the Shannon entropy as a function of the old parameter values only.

The M-step update rule for the parameters  $\lambda_c$  is found by taking the partial derivative of the free energy and setting it to zero:

$$\frac{\partial \mathcal{F}(\theta_t, \theta_{t-1})}{\partial \lambda_{c,t}} = 0. \quad (8)$$

The partial derivative of all terms in the sum on  $c'$  are zero, except for  $c' = c$ . Also, the Shannon entropy is a function of the old parameter values only. Thus, Equation 8 becomes:

$$\begin{aligned} 0 &= \frac{\partial}{\partial \lambda_{c,t}} \sum_n \Pr(c | \bar{y}^{(n)}, \theta_{t-1}) (\ln \Pr(\bar{y}^{(n)} | c, \theta_t) + \ln \Pr(c | \theta_t)) \\ &= \sum_n \Pr(c | \bar{y}^{(n)}, \theta_{t-1}) \left( \frac{\frac{\partial}{\partial \lambda_{c,t}} \Pr(\bar{y}^{(n)} | c, \theta_t)}{\Pr(\bar{y}^{(n)} | c, \theta_t)} + \frac{\frac{\partial}{\partial \lambda_{c,t}} \Pr(c | \theta_t)}{\Pr(c | \theta_t)} \right). \end{aligned}$$

Since the prior  $\Pr(c | \theta_t) = 1/C$  is independent of  $\lambda_{c,t}$ , its derivative is zero. The likelihood of a data point is:

$$\begin{aligned} \Pr(\bar{y}^{(n)} | c, \theta_t) &= \int \Pr(\bar{y}^{(n)} | z, c, \theta_t) \Pr(z | c, \theta_t) dz \\ &= \int \left( \prod_{d=1}^D \text{Pois}(y_d; z W_{cd}) \right) \text{Gam}(z; \alpha_{c,t}, \beta_{c,t-1}) dz. \end{aligned}$$

As shown in Appendix A, this integral is tractable:

$$\Pr(\bar{y}^{(n)} | c, \theta_t) = \left( \prod_{d=1}^D \frac{(W_{cd,t})^{y_d^{(n)}}}{y_d^{(n)}!} \right) (\hat{y}^{(n)}!) \text{NB}(\hat{y}^{(n)}; \alpha_{c,t}, \beta_{c,t-1}).$$

In the limit that  $\alpha_{c,t} \rightarrow \infty$  while  $\alpha_{c,t}/\beta_{c,t-1}$  is held constant, the likelihood of a data point simplifies to:

$$\Pr(\bar{y}^{(n)} | c, \theta_t) \approx \left( \prod_{d=1}^D \frac{(W_{cd,t})^{y_d^{(n)}}}{y_d^{(n)}!} \right) \lambda_{c,t}^{\hat{y}^{(n)}} \exp(-\lambda_{c,t}).$$

Its derivative with respect to  $\lambda_{c,t}$  has a compact form:

$$\frac{\partial}{\partial \lambda_{c,t}} \Pr(\bar{y}^{(n)} | c, \theta_t) = \Pr(\bar{y}^{(n)} | c, \theta_t) \left( \frac{\hat{y}^{(n)}}{\lambda_{c,t}} - 1 \right).$$

Equation 8 can then be written as:

$$\sum_n \Pr(c | \bar{y}^{(n)}, \theta_{t-1}) \left( \frac{\hat{y}^{(n)}}{\lambda_{c,t}} - 1 \right) = 0.$$

Rearranging:

$$\lambda_{c,t} = \frac{\sum_n \Pr(c | \bar{y}^{(n)}, \theta_{t-1}) \hat{y}^{(n)}}{\sum_n \Pr(c | \bar{y}^{(n)}, \theta_{t-1})}.$$

The update rule for the weights  $W_{cd}$  are also found analogously, except for the presence of the constraint that  $\sum_d W_{cd} = 1$ . This constraint is enforced by introducing Lagrangian multipliers  $\Lambda_c$ :

$$\frac{\partial \mathcal{F}(\theta_t, \theta_{t-1})}{\partial W_{cd,t}} + \frac{\partial}{\partial W_{cd,t}} \sum_{c'} \Lambda_{c'} \left( \sum_{d'} W_{c'd',\text{new}} - 1 \right) = 0. \quad (9)$$

The partial derivative of all terms in both sums on  $c'$  are zero, except for  $c' = c$ . Also, the Shannon entropy is a function of the old parameter values only. The derivative of the free energy is then:

$$\frac{\partial \mathcal{F}(\theta_t, \theta_{t-1})}{\partial W_{cd,t}} = \sum_n \Pr(c|\vec{y}^{(n)}, \theta_{t-1}) \left( \frac{\frac{\partial}{\partial W_{cd,t}} \Pr(\vec{y}^{(n)}|c, \theta_t)}{\Pr(\vec{y}^{(n)}|c, \theta_t)} + \frac{\frac{\partial}{\partial W_{cd,t}} \Pr(c|\theta_t)}{\Pr(c|\theta_t)} \right).$$

Since  $\Pr(c|\theta_t) = 1/C$  is independent of the weights, its derivative is zero. The derivative of  $\Pr(\vec{y}^{(n)}|c, \theta_t)$  has a compact form:

$$\frac{\partial}{\partial W_{cd,t}} \Pr(\vec{y}^{(n)}|c, \theta_t) = \Pr(\vec{y}^{(n)}|c, \theta_t) \left( \frac{y_d}{W_{cd,t}} \right),$$

so the derivative of the free energy is:

$$\frac{\partial \mathcal{F}(\theta_t, \theta_{t-1})}{\partial W_{cd,t}} = \sum_n \Pr(c|\vec{y}^{(n)}, \theta_{t-1}) \left( \frac{y_d^{(n)}}{W_{cd,t}} \right).$$

The partial derivative of all terms in the sum on  $d'$  are zero, except for  $d' = d$ . Equation 9 is then:

$$\sum_n \left( \frac{y_d}{W_{cd,t}} \right) \Pr(c|\vec{y}^{(n)}, \theta_{t-1}) + \Lambda_c = 0. \quad (10)$$

Multiplying through by  $W_{cd,t}$ , summing over  $d$ , and letting  $\sum_d W_{cd,t} = 1$ , we find  $\Lambda_c$ :

$$\Lambda_c = - \sum_d \sum_n \Pr(c|\vec{y}^{(n)}, \theta_{t-1}) y_d^{(n)}.$$

Inserting  $\Lambda_c$  into Equation 10 and rearranging for  $W_{cd,t}$ :

$$W_{cd,t} = \frac{\sum_n y_d \Pr(c|\vec{y}^{(n)}, \theta_{t-1})}{\sum_{d'} \sum_n y_{d'} \Pr(c|\vec{y}^{(n)}, \theta_{t-1})}.$$

This is the same updating rule for the weights as that derived in Keck et. al [9]. Notice that if we sum  $W_{cd,t}$  over  $d$ , the sum must be 1 as required.

## Appendix C: Neural Network Learning Approximates EM

If our neural network's synaptic weights are normalized at convergence, then Keck et. al. [9] showed that those weights approximate those given by the EM algorithm for PPG data. Here, we only show that the sum of the weights for each hidden unit  $\bar{W}_c \equiv \sum_d W_{cd}$  converges to 1, and refer interested readers to the complete proof in [9].

Recall the Hebbian plasticity rule for the synapse connecting input neuron  $d$  to hidden neuron  $c$ :

$$\Delta W_{cd} = \epsilon_W (s_c y_d - s_c \lambda_c \bar{W}_c W_{cd}).$$

Summing both sides over  $d$ :

$$\Delta \bar{W}_c = \epsilon_W (s_c \hat{y} - s_c \lambda_c \bar{W}_c^2).$$

Assume that the weights have converged, and let the network observe a batch of  $N$  data points. The change in  $\bar{W}_c$  given the batch of  $N$  data points is:

$$\Delta \bar{W}_c^{(N)} = \frac{1}{N} \sum_n \epsilon_W (s_c^{(n)} \hat{y}^{(n)} - s_c^{(n)} \lambda_c \bar{W}_c^2).$$

Assuming that the inputs  $\vec{y}^{(n)}$  are drawn from a stationary distribution  $\Pr(\vec{y}^{(n)})$ , and assuming a small learning rate and a large batch size, we can accurately approximate the sum with an expectation:

$$\Delta \bar{W}_c^{(N)} \approx \epsilon_W \left( \langle s_c \hat{y} \rangle_{\Pr(\vec{y})} - \lambda_c \bar{W}_c^2 \langle s_c \rangle_{\Pr(\vec{y})} \right). \quad (11)$$

Inserting  $s_c = \Pr(c|\vec{y}, \theta)$ , the left expectation may be written as:

$$\langle s_c \hat{y} \rangle_{\Pr(\vec{y})} = \sum_{\vec{y}} \hat{y} \Pr(c|\vec{y}, \theta) \Pr(\vec{y}) = \sum_{\vec{y}} \hat{y} \frac{\Pr(c, \vec{y}|\theta)}{\Pr(\vec{y}|\theta)} \Pr(\vec{y}).$$

If the true data distribution is the same as the distribution learned by the model, then  $\Pr(\vec{y}|\theta)$  and  $\Pr(\vec{y})$  cancel:

$$\langle s_c \hat{y} \rangle_{\Pr(\vec{y})} = \Pr(c|\theta) \sum_{\vec{y}} \hat{y} \Pr(\vec{y}|c, \theta). \quad (12)$$

We can rewrite the sum as a conditional expectation:

$$\sum_{\vec{y}} \hat{y} \Pr(\vec{y}|c, \theta) = \sum_{\hat{y}} \hat{y} \sum_{\sum_d \vec{y}=\hat{y}} \Pr(\vec{y}|c, \theta) = \sum_{\hat{y}} \hat{y} \Pr(\hat{y}|c, \theta) = \langle \hat{y} \rangle_{\Pr(\hat{y}|c, \theta)}.$$

Using the tower property of conditional expectations and evaluating them for our generative model:

$$\langle \hat{y} \rangle_{\Pr(\hat{y}|c, \theta)} = \left\langle \langle \hat{y} \rangle_{\Pr(\hat{y}|z, c, \theta)} \right\rangle_{\Pr(z|c, \theta)} = \langle z \bar{W}_c \rangle_{\Pr(z|c, \theta)} = \bar{W}_c \lambda_c.$$

Inserting  $\bar{W}_c \lambda_c$  for the sum in Equation 12:

$$\langle s_c \hat{y} \rangle_{\Pr(\vec{y})} \approx \Pr(c|\theta) \bar{W}_c \lambda_c.$$

The right expectation in Equation 11 is:

$$\langle s_c \rangle_{\Pr(\vec{y})} = \sum_{\vec{y}} \Pr(c|\vec{y}, \theta) \Pr(\vec{y}) = \sum_{\vec{y}} \frac{\Pr(\vec{y}|c, \theta) \Pr(c|\theta)}{\Pr(\vec{y}|\theta)} \Pr(\vec{y})$$

If the true data distribution is the same as the distribution learned by the model, then  $\Pr(\vec{y}|\theta)$  and  $\Pr(\vec{y})$  cancel:

$$\langle s_c \rangle_{\Pr(\vec{y})} = \Pr(c|\theta) \sum_{\vec{y}} \Pr(\vec{y}|c, \theta) = \Pr(c|\theta).$$

Inserting our expressions for  $\langle s_c \hat{y} \rangle_{\Pr(\vec{y})}$  and  $\langle s_c \rangle_{\Pr(\vec{y})}$  into Equation 11:

$$\Delta \bar{W}_c^{(N)} \approx \epsilon_W \Pr(c|\theta) \lambda_c \bar{W}_c (1 - \bar{W}_c).$$

This expression has stationary points at  $\bar{W}_c = 1$  and 0. The stationary point at 1 is stable, while the stationary point at 0 is unstable. If the weights are initialized to be positive and the learning rate is sufficiently small,  $\bar{W}_c$  converges to 1.

## Intrinsic Parameters

Recall the learning rule for the intrinsic parameter of hidden neuron  $c$ :

$$\Delta \lambda_c = \epsilon_\lambda (s_c \hat{y} - s_c \lambda_c).$$

Consider the change in  $\lambda_c$  given a batch of  $N$  data points. Again assuming that the inputs are drawn from a stationary distribution, and assuming a small learning rate and large batch size, we can approximate  $\Delta \lambda_c^{(N)}$  with expectations:

$$\Delta \lambda_c^{(N)} \approx \epsilon_\lambda (\langle s_c \hat{y} \rangle_{\Pr(\vec{y})} - \lambda_c \langle s_c \rangle_{\Pr(\vec{y})}).$$

This equation has a stable stationary point at:

$$\lambda_c = \frac{\langle s_c \hat{y} \rangle_{\Pr(\vec{y})}}{\langle s_c \rangle_{\Pr(\vec{y})}}.$$

Comparing this with Equation 4:

$$\lambda_{c,t} = \frac{\sum_n \Pr(c|\vec{y}^{(n)}, \theta_{t-1}) \hat{y}^n}{\sum_n \Pr(c|\vec{y}^{(n)}, \theta_{t-1})},$$

we see that the intrinsic parameters achieve stability when they approximate the expression yielded by the EM algorithm.
